# Supplementary material
Source: Springer Nature journal article supplement (https://www.springermedizin.de/resource/supplementary/12916_2010_285_MOESM4_ESM.PDF/9599554)
Supplement: MOESM4 [file 9599554]

**Supplementary Table 4a. Multivariate disease-free survival results using risk groups and genotypic information  
(Cox-regression model, forward conditional setting)**

| Output Variable(s) | n  | Hazard Ratio | 95% CI for HR | p-value |
|--------------------|----|--------------|---------------|---------|
| Risk group         |    |              |               |         |
| Low/Moderate Vs.   | 35 | -            |               |         |
| High               | 27 | 9.78         | 2.22 - 43.11  | 0.003   |

Inputed variables were "risk groups" and "genotype" (Wildtype vs. KIT vs. PDGFRA mutations), comprising 61 valid samples. For the purposes of this test, recurrences and metastases were included and coded in the High-Risk group. Abbreviations: CI, confidence interval; HR, hazard ratio.

**Supplementary Table 4b. Multivariate disease-free survival results using risk groups, genotypic and CGH information  
(Cox-regression model, forward conditional setting)**

| Output Variable(s) | n  | Hazard Ratio | 95% CI for HR | p-value |
|--------------------|----|--------------|---------------|---------|
| Genomic complexity |    |              |               |         |
| <3 CNCs Vs.        | 15 | -            |               |         |
| ≥3 CNCs            | 12 | 13.68        | 1.68 - 111.11 | 0.014   |

Inputed variables were "risk groups", "genomic complexity", "genotype", "genomic gains", "losses at 1p" and "losses at 22q", comprising 27 valid samples. Abbreviations: CI, confidence interval; HR, hazard ratio.
